# Supplementary material
Source: publisher figshare collection journal article supplement (https://acs.figshare.com/ndownloader/files/4442641)
Supplement: Supplementary file 1 [file 4442641]

 
data_c:\Cao18(230K)(45) 
 
_audit_creation_method            SHELXL-97 
_chemical_name_systematic 
; 
 1,1,6,6-tetraphenyl-2,4-hexadiyne-1,6-diol : 2(1,4-dimethyl-2-pyridinone)  
; 
_chemical_name_common             ? 
_chemical_melting_point           ? 
_chemical_formula_moiety          'C30 H22 O2 : 2(C7 H9 N O)' 
_chemical_formula_sum 
 'C44 H40 N2 O4' 
_chemical_formula_weight          660.78 
 
loop_ 
 _atom_type_symbol 
 _atom_type_description 
 _atom_type_scat_dispersion_real 
 _atom_type_scat_dispersion_imag 
 _atom_type_scat_source 
 'C'  'C'   0.0033   0.0016 
 'International Tables Vol C Tables 4.2.6.8 and 6.1.1.4' 
 'O'  'O'   0.0106   0.0060 
 'International Tables Vol C Tables 4.2.6.8 and 6.1.1.4' 
 'N'  'N'   0.0061   0.0033 
 'International Tables Vol C Tables 4.2.6.8 and 6.1.1.4' 
 'H'  'H'   0.0000   0.0000 
 'International Tables Vol C Tables 4.2.6.8 and 6.1.1.4' 
 
_symmetry_cell_setting            triclinic 
_symmetry_space_group_name_H-M    P-1 
 
loop_ 
 _symmetry_equiv_pos_as_xyz 
 'x, y, z' 
 '-x, -y, -z' 
 
_cell_length_a                    8.4065(3) 
_cell_length_b                    10.7888(4) 
_cell_length_c                    11.3346(4) 
_cell_angle_alpha                 66.9990(10) 
_cell_angle_beta                  86.5420(10) 
_cell_angle_gamma                 67.9670(10) 
_cell_volume                      872.67(5) 
_cell_formula_units_Z             1 
_cell_measurement_temperature     230(2) 
_cell_measurement_reflns_used     ? 
_cell_measurement_theta_min       ? 
_cell_measurement_theta_max       ? 
 
_exptl_crystal_description        prism 
_exptl_crystal_colour             colorless 
_exptl_crystal_size_max           0.3 
_exptl_crystal_size_mid           0.2 
_exptl_crystal_size_min           0.2 
_exptl_crystal_density_meas       ? 
_exptl_crystal_density_diffrn     1.257 
_exptl_crystal_density_method     'not measured' 
_exptl_crystal_F_000              350 
_exptl_absorpt_coefficient_mu     0.080 
_exptl_absorpt_correction_type    none 
_exptl_absorpt_correction_T_min   ? 
_exptl_absorpt_correction_T_max   ? 
_exptl_absorpt_process_details    ? 
 
_exptl_special_details 
; 
 ? 
; 
 
_diffrn_ambient_temperature       230(2) 
_diffrn_radiation_wavelength      0.71073 
_diffrn_radiation_type           'MoK\a'
_diffrn_radiation_source         'sealed tube'
_diffrn_radiation_monochromator  'graphite'
_diffrn_measurement_device_type  'Bruker APEX-II CCD'
_diffrn_measurement_method       '\f and \w scans'
_diffrn_detector_area_resol_mean  ? 
_diffrn_standards_number          0 
_diffrn_standards_interval_count  ? 
_diffrn_standards_interval_time   ? 
_diffrn_standards_decay_%         ? 
_diffrn_reflns_number             15717 
_diffrn_reflns_av_R_equivalents   0.0284 
_diffrn_reflns_av_sigmaI/netI     0.0222 
_diffrn_reflns_limit_h_min        -10 
_diffrn_reflns_limit_h_max        10 
_diffrn_reflns_limit_k_min        -13 
_diffrn_reflns_limit_k_max        13 
_diffrn_reflns_limit_l_min        -14 
_diffrn_reflns_limit_l_max        14 
_diffrn_reflns_theta_min          1.96 
_diffrn_reflns_theta_max          26.89 
_reflns_number_total              3780 
_reflns_number_gt                 2921 
_reflns_threshold_expression      >2sigma(I) 
 
_computing_data_collection      'Bruker APEX2'
_computing_cell_refinement      'Bruker SAINT'
_computing_data_reduction       'Bruker SAINT'
_computing_structure_solution     'SHELXS-97 (Sheldrick, 1990)' 
_computing_structure_refinement   'SHELXL-97 (Sheldrick, 1997)' 
_computing_molecular_graphics     ? 
_computing_publication_material   ? 
 
_refine_special_details 
; 
 Refinement of F^2^ against ALL reflections.  The weighted R-factor wR and 
 goodness of fit S are based on F^2^, conventional R-factors R are based 
 on F, with F set to zero for negative F^2^. The threshold expression of 
 F^2^ > 2sigma(F^2^) is used only for calculating R-factors(gt) etc. and is 
 not relevant to the choice of reflections for refinement.  R-factors based 
 on F^2^ are statistically about twice as large as those based on F, and R- 
 factors based on ALL data will be even larger. 
; 
 
_refine_ls_structure_factor_coef  Fsqd  
_refine_ls_matrix_type            full 
_refine_ls_weighting_scheme       calc  
_refine_ls_weighting_details 
 'calc w=1/[\s^2^(Fo^2^)+(0.0576P)^2^+0.2489P] where P=(Fo^2^+2Fc^2^)/3' 
_atom_sites_solution_primary      direct 
_atom_sites_solution_secondary    difmap 
_atom_sites_solution_hydrogens    geom 
_refine_ls_hydrogen_treatment     mixed 
_refine_ls_extinction_method      SHELXL 
_refine_ls_extinction_coef        0.017(4) 
_refine_ls_extinction_expression 
 'Fc^*^=kFc[1+0.001xFc^2^\l^3^/sin(2\q)]^-1/4^' 
_refine_ls_number_reflns          3780 
_refine_ls_number_parameters      284 
_refine_ls_number_restraints      0 
_refine_ls_R_factor_all           0.0593 
_refine_ls_R_factor_gt            0.0433 
_refine_ls_wR_factor_ref          0.1255 
_refine_ls_wR_factor_gt           0.1131 
_refine_ls_goodness_of_fit_ref    1.023 
_refine_ls_restrained_S_all       1.023 
_refine_ls_shift/su_max           0.030 
_refine_ls_shift/su_mean          0.002 
 
loop_ 
 _atom_site_label 
 _atom_site_type_symbol 
 _atom_site_fract_x 
 _atom_site_fract_y 
 _atom_site_fract_z 
 _atom_site_U_iso_or_equiv 
 _atom_site_adp_type 
 _atom_site_occupancy 
 _atom_site_symmetry_multiplicity 
 _atom_site_calc_flag 
 _atom_site_refinement_flags 
 _atom_site_disorder_assembly 
 _atom_site_disorder_group 
O1 O 0.61633(14) 0.75675(12) -0.33733(9) 0.0393(3) Uani 1 1 d . . . 
H1 H 0.676(2) 0.668(2) -0.3222(16) 0.047 Uiso 1 1 d . . . 
C1 C 0.52305(17) 0.55471(14) -0.04355(13) 0.0324(3) Uani 1 1 d . . . 
C2 C 0.56409(17) 0.64909(14) -0.11933(13) 0.0316(3) Uani 1 1 d . . . 
C3 C 0.60489(17) 0.76966(14) -0.21685(12) 0.0296(3) Uani 1 1 d . . . 
C4 C 0.77193(17) 0.77469(14) -0.17552(14) 0.0333(3) Uani 1 1 d . . . 
C5 C 0.86341(18) 0.68655(16) -0.05622(15) 0.0387(3) Uani 1 1 d . . . 
H5 H 0.8263 0.6171 0.0028 0.046 Uiso 1 1 calc R . . 
C6 C 1.0109(2) 0.7004(2) -0.02301(19) 0.0537(5) Uani 1 1 d . . . 
H6 H 1.0717 0.6408 0.0579 0.064 Uiso 1 1 calc R . . 
C7 C 1.0659(2) 0.8025(2) -0.1104(2) 0.0667(6) Uani 1 1 d . . . 
H7 H 1.1641 0.8124 -0.0885 0.080 Uiso 1 1 calc R . . 
C8 C 0.9766(3) 0.8898(2) -0.2296(2) 0.0736(6) Uani 1 1 d . . . 
H8 H 1.0146 0.9587 -0.2885 0.088 Uiso 1 1 calc R . . 
C9 C 0.8301(2) 0.8764(2) -0.26320(19) 0.0558(5) Uani 1 1 d . . . 
H9 H 0.7706 0.9357 -0.3446 0.067 Uiso 1 1 calc R . . 
C10 C 0.45437(17) 0.91295(14) -0.23349(13) 0.0320(3) Uani 1 1 d . . . 
C11 C 0.35778(19) 1.00568(16) -0.35066(15) 0.0418(4) Uani 1 1 d . . . 
H11 H 0.3842 0.9830 -0.4225 0.050 Uiso 1 1 calc R . . 
C12 C 0.2206(2) 1.13335(17) -0.36090(18) 0.0535(4) Uani 1 1 d . . . 
H12 H 0.1563 1.1961 -0.4400 0.064 Uiso 1 1 calc R . . 
C13 C 0.1796(2) 1.16750(18) -0.2555(2) 0.0557(5) Uani 1 1 d . . . 
H13 H 0.0867 1.2522 -0.2630 0.067 Uiso 1 1 calc R . . 
C14 C 0.2768(2) 1.07550(18) -0.13808(19) 0.0519(4) Uani 1 1 d . . . 
H14 H 0.2495 1.0984 -0.0664 0.062 Uiso 1 1 calc R . . 
C15 C 0.4147(2) 0.94947(16) -0.12742(15) 0.0408(3) Uani 1 1 d . . . 
H15 H 0.4812 0.8887 -0.0488 0.049 Uiso 1 1 calc R . . 
O2 O 0.22228(16) 0.52929(12) 0.30231(11) 0.0534(3) Uani 1 1 d . . . 
N1A N 0.3150(9) 0.6813(11) 0.3419(10) 0.0547(18) Uani 0.553(5) 1 d P . . 
C16A C 0.2419(7) 0.5774(7) 0.3786(7) 0.0449(13) Uani 0.553(5) 1 d P . . 
C17A C 0.2011(4) 0.5329(3) 0.5070(3) 0.0473(9) Uani 0.553(5) 1 d P . . 
H17 H 0.1515 0.4636 0.5358 0.057 Uiso 0.553(5) 1 calc PR . . 
C18A C 0.2302(7) 0.5857(6) 0.5915(6) 0.0480(12) Uani 0.553(5) 1 d P . . 
C19 C 0.3350(3) 0.6709(2) 0.55194(19) 0.0676(6) Uani 1 1 d . . . 
H19 H 0.3904 0.6842 0.6120 0.081 Uiso 1 1 calc R . . 
C20A C 0.3501(6) 0.7296(5) 0.4283(4) 0.0665(11) Uani 0.553(5) 1 d P . . 
H20 H 0.3861 0.8073 0.3984 0.080 Uiso 0.553(5) 1 calc PR . . 
C21 C 0.3528(3) 0.7412(3) 0.2073(2) 0.0766(6) Uani 1 1 d . . . 
H21A H 0.2467 0.8028 0.1527 0.115 Uiso 1 1 calc R . . 
H21B H 0.4149 0.6628 0.1813 0.115 Uiso 1 1 calc R . . 
H21C H 0.4214 0.7972 0.2004 0.115 Uiso 1 1 calc R . . 
C22 C 0.1883(3) 0.5302(3) 0.7183(2) 0.0784(6) Uani 1 1 d . . . 
H22A H 0.2750 0.4356 0.7657 0.118 Uiso 1 1 calc R . . 
H22B H 0.0784 0.5223 0.7171 0.118 Uiso 1 1 calc R . . 
H22C H 0.1827 0.5947 0.7589 0.118 Uiso 1 1 calc R . . 
N1B N 0.3664(10) 0.6533(10) 0.3428(10) 0.0366(14) Uani 0.447(5) 1 d P . . 
C16B C 0.3055(7) 0.5479(8) 0.3810(7) 0.0334(12) Uani 0.447(5) 1 d P . . 
C17B C 0.3410(4) 0.4527(4) 0.5251(3) 0.0359(10) Uani 0.447(5) 1 d P . . 
C18B C 0.2994(7) 0.5502(7) 0.5977(6) 0.0363(11) Uani 0.447(5) 1 d P . . 
C20B C 0.4632(6) 0.6658(4) 0.4389(3) 0.0365(10) Uani 0.447(5) 1 d P . . 
H17B H 0.267(5) 0.402(4) 0.543(3) 0.044 Uiso 0.447(5) 1 d P . . 
H20B H 0.470(5) 0.761(4) 0.399(3) 0.044 Uiso 0.447(5) 1 d P . . 
 
loop_ 
 _atom_site_aniso_label 
 _atom_site_aniso_U_11 
 _atom_site_aniso_U_22 
 _atom_site_aniso_U_33 
 _atom_site_aniso_U_23 
 _atom_site_aniso_U_13 
 _atom_site_aniso_U_12 
O1 0.0512(6) 0.0371(5) 0.0329(5) -0.0157(4) 0.0066(4) -0.0189(5) 
C1 0.0320(7) 0.0295(6) 0.0387(7) -0.0137(6) 0.0071(5) -0.0153(5) 
C2 0.0311(7) 0.0294(6) 0.0369(7) -0.0133(6) 0.0051(5) -0.0144(5) 
C3 0.0337(7) 0.0299(6) 0.0289(6) -0.0106(5) 0.0058(5) -0.0176(5) 
C4 0.0326(7) 0.0319(7) 0.0418(8) -0.0177(6) 0.0092(6) -0.0167(6) 
C5 0.0360(7) 0.0419(8) 0.0435(8) -0.0229(7) 0.0060(6) -0.0147(6) 
C6 0.0369(8) 0.0620(11) 0.0719(12) -0.0431(10) -0.0029(8) -0.0107(8) 
C7 0.0383(9) 0.0720(13) 0.1182(18) -0.0596(13) 0.0107(10) -0.0283(9) 
C8 0.0556(11) 0.0655(12) 0.1117(18) -0.0280(13) 0.0185(12) -0.0447(10) 
C9 0.0511(10) 0.0519(10) 0.0638(11) -0.0092(8) 0.0085(8) -0.0339(8) 
C10 0.0338(7) 0.0289(6) 0.0373(7) -0.0108(6) 0.0074(6) -0.0192(6) 
C11 0.0426(8) 0.0375(8) 0.0420(8) -0.0087(6) 0.0037(6) -0.0192(7) 
C12 0.0465(9) 0.0347(8) 0.0631(11) -0.0035(8) -0.0042(8) -0.0138(7) 
C13 0.0426(9) 0.0323(8) 0.0880(14) -0.0222(9) 0.0103(9) -0.0123(7) 
C14 0.0516(10) 0.0454(9) 0.0701(11) -0.0341(9) 0.0175(8) -0.0203(8) 
C15 0.0437(8) 0.0375(8) 0.0443(8) -0.0182(6) 0.0068(6) -0.0173(6) 
O2 0.0625(8) 0.0481(7) 0.0552(7) -0.0313(6) -0.0031(6) -0.0144(6) 
N1A 0.056(4) 0.053(4) 0.061(3) -0.029(3) 0.019(3) -0.024(3) 
C16A 0.044(3) 0.035(2) 0.053(2) -0.0223(18) -0.001(3) -0.006(2) 
C17A 0.060(2) 0.0351(15) 0.0478(17) -0.0159(12) -0.0028(14) -0.0183(15) 
C18A 0.053(3) 0.037(2) 0.048(2) -0.0211(18) -0.007(3) -0.005(2) 
C19 0.1020(16) 0.0769(13) 0.0558(11) -0.0366(10) 0.0077(11) -0.0567(13) 
C20A 0.055(3) 0.063(2) 0.101(3) -0.044(2) 0.012(2) -0.033(2) 
C21 0.0999(17) 0.0777(14) 0.0594(12) -0.0258(11) 0.0258(12) -0.0457(13) 
C22 0.1000(17) 0.0793(15) 0.0632(13) -0.0284(11) 0.0135(12) -0.0426(13) 
N1B 0.045(4) 0.032(3) 0.034(2) -0.0118(18) 0.001(3) -0.017(3) 
C16B 0.037(3) 0.035(3) 0.035(2) -0.021(2) 0.004(3) -0.013(3) 
C17B 0.040(2) 0.0386(19) 0.0389(18) -0.0178(14) 0.0077(14) -0.0239(17) 
C18B 0.034(3) 0.035(3) 0.040(2) -0.019(2) 0.005(2) -0.010(2) 
C20B 0.048(3) 0.0296(17) 0.0374(17) -0.0133(14) 0.0034(15) -0.0207(18) 
 
_geom_special_details 
; 
 All esds (except the esd in the dihedral angle between two l.s. planes) 
 are estimated using the full covariance matrix.  The cell esds are taken 
 into account individually in the estimation of esds in distances, angles 
 and torsion angles; correlations between esds in cell parameters are only 
 used when they are defined by crystal symmetry.  An approximate (isotropic) 
 treatment of cell esds is used for estimating esds involving l.s. planes. 
; 
 
loop_ 
 _geom_bond_atom_site_label_1 
 _geom_bond_atom_site_label_2 
 _geom_bond_distance 
 _geom_bond_site_symmetry_2 
 _geom_bond_publ_flag 
O1 C3 1.4199(16) . ? 
O1 H1 0.848(19) . ? 
C1 C2 1.1991(18) . ? 
C1 C1 1.380(3) 2_665 ? 
C2 C3 1.4822(17) . ? 
C3 C4 1.5332(18) . ? 
C3 C10 1.5362(19) . ? 
C4 C5 1.377(2) . ? 
C4 C9 1.387(2) . ? 
C5 C6 1.393(2) . ? 
C5 H5 0.9300 . ? 
C6 C7 1.372(3) . ? 
C6 H6 0.9300 . ? 
C7 C8 1.370(3) . ? 
C7 H7 0.9300 . ? 
C8 C9 1.384(3) . ? 
C8 H8 0.9300 . ? 
C9 H9 0.9300 . ? 
C10 C11 1.381(2) . ? 
C10 C15 1.391(2) . ? 
C11 C12 1.393(2) . ? 
C11 H11 0.9300 . ? 
C12 C13 1.371(3) . ? 
C12 H12 0.9300 . ? 
C13 C14 1.384(3) . ? 
C13 H13 0.9300 . ? 
C14 C15 1.383(2) . ? 
C14 H14 0.9300 . ? 
C15 H15 0.9300 . ? 
O2 C16A 1.216(7) . ? 
O2 C16B 1.283(7) . ? 
N1A C16B 1.363(14) . ? 
N1A C20A 1.366(11) . ? 
N1A C16A 1.389(13) . ? 
N1A C21 1.473(11) . ? 
N1A C20B 1.630(11) . ? 
C16A C17A 1.408(8) . ? 
C16A N1B 1.505(13) . ? 
C17A C18A 1.363(6) . ? 
C17A H17 0.9300 . ? 
C17A H17B 1.21(4) . ? 
C18A C22 1.406(7) . ? 
C18A C19 1.436(7) . ? 
C18A C17B 1.802(6) . ? 
C19 C20A 1.314(5) . ? 
C19 H19 0.9300 . ? 
C20A H20 0.9300 . ? 
C20A H20B 1.18(4) . ? 
C21 H21A 0.9600 . ? 
C21 H21B 0.9600 . ? 
C21 H21C 0.9600 . ? 
C22 H22A 0.9600 . ? 
C22 H22B 0.9600 . ? 
C22 H22C 0.9600 . ? 
N1B C16B 1.330(13) . ? 
N1B C20B 1.473(10) . ? 
C16B C17B 1.527(8) . ? 
C17B C18B 1.507(7) . ? 
C17B C20B 1.613(6) 2_666 ? 
C17B H17B 0.94(4) . ? 
C20B C17B 1.613(6) 2_666 ? 
C20B H20B 0.97(4) . ? 
 
loop_ 
 _geom_angle_atom_site_label_1 
 _geom_angle_atom_site_label_2 
 _geom_angle_atom_site_label_3 
 _geom_angle 
 _geom_angle_site_symmetry_1 
 _geom_angle_site_symmetry_3 
 _geom_angle_publ_flag 
C3 O1 H1 106.8(12) . . ? 
C2 C1 C1 179.6(2) . 2_665 ? 
C1 C2 C3 176.76(14) . . ? 
O1 C3 C2 110.06(10) . . ? 
O1 C3 C4 110.18(11) . . ? 
C2 C3 C4 112.16(11) . . ? 
O1 C3 C10 107.86(11) . . ? 
C2 C3 C10 107.48(10) . . ? 
C4 C3 C10 108.96(10) . . ? 
C5 C4 C9 119.03(14) . . ? 
C5 C4 C3 123.57(12) . . ? 
C9 C4 C3 117.39(13) . . ? 
C4 C5 C6 120.69(15) . . ? 
C4 C5 H5 119.7 . . ? 
C6 C5 H5 119.7 . . ? 
C7 C6 C5 119.61(17) . . ? 
C7 C6 H6 120.2 . . ? 
C5 C6 H6 120.2 . . ? 
C8 C7 C6 120.12(16) . . ? 
C8 C7 H7 119.9 . . ? 
C6 C7 H7 119.9 . . ? 
C7 C8 C9 120.51(18) . . ? 
C7 C8 H8 119.7 . . ? 
C9 C8 H8 119.7 . . ? 
C8 C9 C4 120.04(18) . . ? 
C8 C9 H9 120.0 . . ? 
C4 C9 H9 120.0 . . ? 
C11 C10 C15 119.42(13) . . ? 
C11 C10 C3 121.66(13) . . ? 
C15 C10 C3 118.92(12) . . ? 
C10 C11 C12 119.74(16) . . ? 
C10 C11 H11 120.1 . . ? 
C12 C11 H11 120.1 . . ? 
C13 C12 C11 120.69(16) . . ? 
C13 C12 H12 119.7 . . ? 
C11 C12 H12 119.7 . . ? 
C12 C13 C14 119.81(15) . . ? 
C12 C13 H13 120.1 . . ? 
C14 C13 H13 120.1 . . ? 
C15 C14 C13 119.89(17) . . ? 
C15 C14 H14 120.1 . . ? 
C13 C14 H14 120.1 . . ? 
C14 C15 C10 120.43(15) . . ? 
C14 C15 H15 119.8 . . ? 
C10 C15 H15 119.8 . . ? 
C16A O2 C16B 23.1(3) . . ? 
C16B N1A C20A 121.4(9) . . ? 
C16B N1A C16A 21.1(3) . . ? 
C20A N1A C16A 120.9(8) . . ? 
C16B N1A C21 114.6(8) . . ? 
C20A N1A C21 119.8(8) . . ? 
C16A N1A C21 119.3(8) . . ? 
C16B N1A C20B 107.2(7) . . ? 
C20A N1A C20B 34.5(3) . . ? 
C16A N1A C20B 119.8(7) . . ? 
C21 N1A C20B 110.0(6) . . ? 
O2 C16A N1A 119.6(7) . . ? 
O2 C16A C17A 125.2(6) . . ? 
N1A C16A C17A 115.2(7) . . ? 
O2 C16A N1B 114.1(6) . . ? 
N1A C16A N1B 16.2(5) . . ? 
C17A C16A N1B 118.0(6) . . ? 
C18A C17A C16A 123.6(5) . . ? 
C18A C17A H17 118.2 . . ? 
C16A C17A H17 118.2 . . ? 
C18A C17A H17B 114.9(18) . . ? 
C16A C17A H17B 100.8(17) . . ? 
H17 C17A H17B 49.9 . . ? 
C17A C18A C22 118.5(5) . . ? 
C17A C18A C19 116.5(5) . . ? 
C22 C18A C19 123.6(4) . . ? 
C17A C18A C17B 39.3(2) . . ? 
C22 C18A C17B 115.8(4) . . ? 
C19 C18A C17B 98.9(3) . . ? 
C20A C19 C18A 117.9(3) . . ? 
C20A C19 H19 121.0 . . ? 
C18A C19 H19 121.1 . . ? 
C19 C20A N1A 122.7(5) . . ? 
C19 C20A H20 118.6 . . ? 
N1A C20A H20 118.6 . . ? 
C19 C20A H20B 117.6(18) . . ? 
N1A C20A H20B 108.0(18) . . ? 
H20 C20A H20B 36.3 . . ? 
N1A C21 H21A 109.5 . . ? 
N1A C21 H21B 109.5 . . ? 
H21A C21 H21B 109.5 . . ? 
N1A C21 H21C 109.5 . . ? 
H21A C21 H21C 109.5 . . ? 
H21B C21 H21C 109.5 . . ? 
C18A C22 H22A 109.5 . . ? 
C18A C22 H22B 109.5 . . ? 
H22A C22 H22B 109.5 . . ? 
C18A C22 H22C 109.5 . . ? 
H22A C22 H22C 109.5 . . ? 
H22B C22 H22C 109.5 . . ? 
C16B N1B C20B 118.9(8) . . ? 
C16B N1B C16A 19.3(3) . . ? 
C20B N1B C16A 122.8(8) . . ? 
O2 C16B N1B 122.2(7) . . ? 
O2 C16B N1A 116.7(7) . . ? 
N1B C16B N1A 18.0(5) . . ? 
O2 C16B C17B 123.0(6) . . ? 
N1B C16B C17B 114.7(6) . . ? 
N1A C16B C17B 117.2(7) . . ? 
C18B C17B C16B 108.6(4) . . ? 
C18B C17B C20B 112.7(3) . 2_666 ? 
C16B C17B C20B 111.0(3) . 2_666 ? 
C18B C17B C18A 16.4(3) . . ? 
C16B C17B C18A 101.1(4) . . ? 
C20B C17B C18A 128.9(3) 2_666 . ? 
C18B C17B H17B 111(2) . . ? 
C16B C17B H17B 106(2) . . ? 
C20B C17B H17B 108(2) 2_666 . ? 
C18A C17B H17B 100(2) . . ? 
N1B C20B C17B 112.5(4) . 2_666 ? 
N1B C20B N1A 14.5(5) . . ? 
C17B C20B N1A 126.8(4) 2_666 . ? 
N1B C20B H20B 106(2) . . ? 
C17B C20B H20B 107(2) 2_666 . ? 
N1A C20B H20B 102(2) . . ? 
 
loop_ 
 _geom_torsion_atom_site_label_1 
 _geom_torsion_atom_site_label_2 
 _geom_torsion_atom_site_label_3 
 _geom_torsion_atom_site_label_4 
 _geom_torsion 
 _geom_torsion_site_symmetry_1 
 _geom_torsion_site_symmetry_2 
 _geom_torsion_site_symmetry_3 
 _geom_torsion_site_symmetry_4 
 _geom_torsion_publ_flag 
C1 C1 C2 C3 131(27) 2_665 . . . ? 
C1 C2 C3 O1 -71(3) . . . . ? 
C1 C2 C3 C4 166(2) . . . . ? 
C1 C2 C3 C10 47(3) . . . . ? 
O1 C3 C4 C5 -129.06(14) . . . . ? 
C2 C3 C4 C5 -6.08(18) . . . . ? 
C10 C3 C4 C5 112.79(14) . . . . ? 
O1 C3 C4 C9 52.44(17) . . . . ? 
C2 C3 C4 C9 175.41(13) . . . . ? 
C10 C3 C4 C9 -65.72(16) . . . . ? 
C9 C4 C5 C6 0.9(2) . . . . ? 
C3 C4 C5 C6 -177.58(13) . . . . ? 
C4 C5 C6 C7 -0.3(2) . . . . ? 
C5 C6 C7 C8 -0.2(3) . . . . ? 
C6 C7 C8 C9 0.1(3) . . . . ? 
C7 C8 C9 C4 0.5(3) . . . . ? 
C5 C4 C9 C8 -1.0(3) . . . . ? 
C3 C4 C9 C8 177.60(17) . . . . ? 
O1 C3 C10 C11 -0.95(16) . . . . ? 
C2 C3 C10 C11 -119.58(13) . . . . ? 
C4 C3 C10 C11 118.65(13) . . . . ? 
O1 C3 C10 C15 178.87(11) . . . . ? 
C2 C3 C10 C15 60.23(15) . . . . ? 
C4 C3 C10 C15 -61.53(15) . . . . ? 
C15 C10 C11 C12 -0.9(2) . . . . ? 
C3 C10 C11 C12 178.96(13) . . . . ? 
C10 C11 C12 C13 -0.5(2) . . . . ? 
C11 C12 C13 C14 1.0(3) . . . . ? 
C12 C13 C14 C15 -0.1(2) . . . . ? 
C13 C14 C15 C10 -1.2(2) . . . . ? 
C11 C10 C15 C14 1.7(2) . . . . ? 
C3 C10 C15 C14 -178.09(13) . . . . ? 
C16B O2 C16A N1A 72.0(16) . . . . ? 
C16B O2 C16A C17A -105.8(19) . . . . ? 
C16B O2 C16A N1B 55.0(15) . . . . ? 
C16B N1A C16A O2 -77.3(15) . . . . ? 
C20A N1A C16A O2 -175.2(5) . . . . ? 
C21 N1A C16A O2 5.5(8) . . . . ? 
C20B N1A C16A O2 -135.1(6) . . . . ? 
C16B N1A C16A C17A 100.7(17) . . . . ? 
C20A N1A C16A C17A 2.8(8) . . . . ? 
C21 N1A C16A C17A -176.4(4) . . . . ? 
C20B N1A C16A C17A 42.9(7) . . . . ? 
C16B N1A C16A N1B -3(3) . . . . ? 
C20A N1A C16A N1B -101(3) . . . . ? 
C21 N1A C16A N1B 80(3) . . . . ? 
C20B N1A C16A N1B -61(3) . . . . ? 
O2 C16A C17A C18A 177.7(4) . . . . ? 
N1A C16A C17A C18A -0.2(7) . . . . ? 
N1B C16A C17A C18A 17.6(7) . . . . ? 
C16A C17A C18A C22 -178.3(3) . . . . ? 
C16A C17A C18A C19 -11.2(6) . . . . ? 
C16A C17A C18A C17B -81.5(4) . . . . ? 
C17A C18A C19 C20A 20.7(6) . . . . ? 
C22 C18A C19 C20A -172.9(4) . . . . ? 
C17B C18A C19 C20A 57.8(4) . . . . ? 
C18A C19 C20A N1A -19.4(7) . . . . ? 
C16B N1A C20A C19 -17.2(9) . . . . ? 
C16A N1A C20A C19 7.5(9) . . . . ? 
C21 N1A C20A C19 -173.3(5) . . . . ? 
C20B N1A C20A C19 -91.2(6) . . . . ? 
O2 C16A N1B C16B -70.0(16) . . . . ? 
N1A C16A N1B C16B 176(3) . . . . ? 
C17A C16A N1B C16B 92.3(18) . . . . ? 
O2 C16A N1B C20B -154.2(6) . . . . ? 
N1A C16A N1B C20B 92(3) . . . . ? 
C17A C16A N1B C20B 8.1(9) . . . . ? 
C16A O2 C16B N1B -90.3(18) . . . . ? 
C16A O2 C16B N1A -70.6(16) . . . . ? 
C16A O2 C16B C17B 89.1(17) . . . . ? 
C20B N1B C16B O2 -179.0(5) . . . . ? 
C16A N1B C16B O2 73.8(16) . . . . ? 
C20B N1B C16B N1A 104(3) . . . . ? 
C16A N1B C16B N1A -3(3) . . . . ? 
C20B N1B C16B C17B 1.6(8) . . . . ? 
C16A N1B C16B C17B -105.6(18) . . . . ? 
C20A N1A C16B O2 159.1(5) . . . . ? 
C16A N1A C16B O2 64.1(14) . . . . ? 
C21 N1A C16B O2 -43.7(7) . . . . ? 
C20B N1A C16B O2 -166.2(5) . . . . ? 
C20A N1A C16B N1B -88(3) . . . . ? 
C16A N1A C16B N1B 177(3) . . . . ? 
C21 N1A C16B N1B 69(2) . . . . ? 
C20B N1A C16B N1B -54(2) . . . . ? 
C20A N1A C16B C17B -1.8(8) . . . . ? 
C16A N1A C16B C17B -96.8(17) . . . . ? 
C21 N1A C16B C17B 155.4(5) . . . . ? 
C20B N1A C16B C17B 32.9(7) . . . . ? 
O2 C16B C17B C18B -133.7(5) . . . . ? 
N1B C16B C17B C18B 45.8(6) . . . . ? 
N1A C16B C17B C18B 25.9(6) . . . . ? 
O2 C16B C17B C20B 101.9(5) . . . 2_666 ? 
N1B C16B C17B C20B -78.7(6) . . . 2_666 ? 
N1A C16B C17B C20B -98.5(5) . . . 2_666 ? 
O2 C16B C17B C18A -118.6(5) . . . . ? 
N1B C16B C17B C18A 60.9(6) . . . . ? 
N1A C16B C17B C18A 41.0(6) . . . . ? 
C17A C18A C17B C18B 174.5(17) . . . . ? 
C22 C18A C17B C18B -81.3(14) . . . . ? 
C19 C18A C17B C18B 53.0(14) . . . . ? 
C17A C18A C17B C16B 55.6(4) . . . . ? 
C22 C18A C17B C16B 159.9(4) . . . . ? 
C19 C18A C17B C16B -65.9(4) . . . . ? 
C17A C18A C17B C20B -175.5(4) . . . 2_666 ? 
C22 C18A C17B C20B -71.2(5) . . . 2_666 ? 
C19 C18A C17B C20B 63.1(5) . . . 2_666 ? 
C16B N1B C20B C17B 78.0(7) . . . 2_666 ? 
C16A N1B C20B C17B 100.0(6) . . . 2_666 ? 
C16B N1B C20B N1A -93(3) . . . . ? 
C16A N1B C20B N1A -71(3) . . . . ? 
C16B N1A C20B N1B 63(3) . . . . ? 
C20A N1A C20B N1B -176(3) . . . . ? 
C16A N1A C20B N1B 82(3) . . . . ? 
C21 N1A C20B N1B -62(3) . . . . ? 
C16B N1A C20B C17B 52.6(8) . . . 2_666 ? 
C20A N1A C20B C17B 173.5(6) . . . 2_666 ? 
C16A N1A C20B C17B 71.2(8) . . . 2_666 ? 
C21 N1A C20B C17B -72.7(7) . . . 2_666 ? 
 
_diffrn_measured_fraction_theta_max    0.999 
_diffrn_reflns_theta_full              26.89 
_diffrn_measured_fraction_theta_full   0.999 
_refine_diff_density_max    0.340 
_refine_diff_density_min   -0.244 
_refine_diff_density_rms    0.034 
